# Supplementary material for: High-resolution regional emission inventory contributes to the evaluation of policy effectiveness: a case study in Jiangsu Province, China
Source: Copernicus journal article supplement (doi:10.5194/acp-23-4247-2023), 2023-04-06
Supplement: Supplementary file 1 [file acp-23-4247-2023-supplement.pdf]

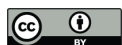

*Supplement of*

## **High-resolution regional emission inventory contributes to the evaluation of policy effectiveness: a case study in Jiangsu Province, China**

**Chen Gu et al.**

*Correspondence to:* Yu Zhao (yuzhao@nju.edu.cn)

The copyright of individual parts of the supplement might differ from the article licence.

# Supplement

## Table List

Table S1 Source categories of the emission inventory for Jiangsu Province, China.

Table S2 Comparisons between observed and simulated meteorological parameters in D3.

Table S3 The meteorological variation (VMET) and emission variation scenarios (VEMIS) for evaluating the contributions of the two factors to changing air quality for 2015-2017 and 2017-2019.

Table S4 Annual air pollutant emissions in Jiangsu from 2015 to 2019 ( $Gg \cdot yr^{-1}$ ).

Table S5 The emission data of  $SO_2$ ,  $NO_x$ , AVOCs,  $PM_{2.5}$ , and  $NH_3$  by year and city for 2015 and 2019 ( $Gg \cdot yr^{-1}$ ).

Table S6 Comparison of observed and simulated hourly  $PM_{2.5}$  concentrations by month in Jiangsu. In total, 110 state-operated observation sites were included in the comparison.

Table S7 The same as Table S6 but for MDA8  $O_3$ .

Table S8 Comparison of observed and simulated hourly  $SO_2$  and  $NO_2$  concentrations by month for 2017 in Jiangsu. In total, 110 state-operated observation sites were included in the comparison.

## Figure List

Figure S1 The modeling domain (a) and the locations of Jiangsu province (with its 13 cities) and state-operating ground stations of air quality observation (b). The map data provided by Resource and Environment Data Cloud Platform are freely available for academic use (<http://www.resdc.cn/data.aspx?DATAID=201>), © Institute of Geographic Sciences & Natural Resources Research, Chinese Academy of Sciences.

Figure S2 Summary of major air pollution control measures taken between 2015 and 2019. De-S, desulfurization; De-N, NO<sub>x</sub> control; NG, natural gas.

Figure S3 The locations of key industries in Jiangsu. The blue line indicates the Yangtze River.

Figure S4 Spatial distribution of air pollutant emissions in 2019 at a horizontal resolution of 3km. The species include (a) SO<sub>2</sub>, (b) NO<sub>x</sub>, (c) CO, (d) AVOCs, (e) NH<sub>3</sub>, (f) PM<sub>10</sub>, (g) PM<sub>2.5</sub>, (h) BC, and (i) OC.

Figure S5 The spatial distribution of BVOCs emissions from 2015 to 2019 at a horizontal resolution of 3 km.

Figure S6 Annual actual emissions reductions of SO<sub>2</sub>, NO<sub>x</sub>, AVOCs, NH<sub>3</sub>, and PM<sub>2.5</sub> during 2015-2017 and 2017-2019.

Figure S7 Average pollutant removal efficiencies in the key industries including power, steel and cement production.

Figure S8 Spatial distribution of MDA8 O<sub>3</sub> from CMAQ simulation in January, April, July and October from 2015 to 2019 at a horizontal resolution of 3km (μg·m<sup>-3</sup>).

Figure S9 The same as Figure S8 but for PM<sub>2.5</sub>.

**Table S1 Source categories of the emission inventory for Jiangsu Province, China.**

| <b>Sector (1<sup>st</sup> level)</b> | <b>Subsector(2<sup>nd</sup> level)</b> | <b>Fuel/product/process(3<sup>rd</sup> level)</b>                                                                                                                                                                                                                                                  |
|--------------------------------------|----------------------------------------|----------------------------------------------------------------------------------------------------------------------------------------------------------------------------------------------------------------------------------------------------------------------------------------------------|
| Power sector                         | Power plant                            | Coal (8 categories)/ Fuel oil/ Natural gas/other 8 categories                                                                                                                                                                                                                                      |
| Industry                             | Boilers                                | Coal (8 categories)/Fuel oil/Diesel/Natural gas/Biomass                                                                                                                                                                                                                                            |
|                                      | Mining                                 | Coal mining<br>Oil and gas extraction<br>Metal mining<br>Non-metallic mining                                                                                                                                                                                                                       |
|                                      | Petroleum refining                     | Process devices<br>Equipment leak<br>Storage tanks<br>Loading and unloading<br>Flares<br>Wastewater treatment<br>Cooling Tower<br>Petrochemical furnace                                                                                                                                            |
|                                      | Coking                                 | Coke production                                                                                                                                                                                                                                                                                    |
|                                      | Chemical manufacturing                 | Organic chemical manufacturing (18 categories)<br>Inorganic chemical manufacturing (10 categories)<br>Fertilizer (7 categories)<br>Pesticide (8 categories)<br>Coating production (16 categories)<br>Ink production<br>Synthetic resin/ Synthetic rubber (6 categories)<br>Synthetic fiber monomer |

---

|                                    |                                                                       |
|------------------------------------|-----------------------------------------------------------------------|
|                                    | Specialty chemicals                                                   |
|                                    | Household chemicals (11 categories)                                   |
|                                    | Chemical fiber (6 categories)                                         |
| Rubber and plastic manufacturing   | Rubber products/ Plastic products (30 categories)                     |
| Non-metallic mineral manufacturing | Cement manufacturing/ Lime manufacturing/ Plaster manufacturing       |
|                                    | Commodity concrete/ Brick and tile products/ Crushed Stone processing |
|                                    | Abrasive processing/ Asphalt products /                               |
|                                    | Glass products/ Glass fiber/ Gypsum board                             |
|                                    | Ceramic products/ Refractory products                                 |
| Ferrous metal manufacturing        | Raw material yard                                                     |
|                                    | Sintering                                                             |
|                                    | Pellet                                                                |
|                                    | Blast furnace                                                         |
|                                    | Converter                                                             |
|                                    | Electric furnace                                                      |
|                                    | Casting steel                                                         |
|                                    | Rolling steel                                                         |
|                                    | Ferroalloy production                                                 |
| Non-ferrous metal manufacturing    | Primary copper/ Primary aluminum/ Primary lead                        |
|                                    | Primary zinc/ Secondary copper/ Secondary aluminum                    |
| Food manufacturing                 |                                                                       |
| Tobacco manufacturing              |                                                                       |
| Wood processing                    |                                                                       |
| Papermaking                        | Pulp manufacturing                                                    |
| Agricultural products processing   |                                                                       |
| Beverage manufacturing             | Alcohol/ Liquor/ Red wine/ Beer                                       |

---

---

|                |                                   |                              |
|----------------|-----------------------------------|------------------------------|
|                | Textile                           |                              |
|                | Leather tanning                   |                              |
|                | Furniture manufacturing           |                              |
|                | Package and printing              |                              |
|                | Pharmaceutical manufacturing      |                              |
|                | Shoemaking                        |                              |
|                | Metal products                    |                              |
|                | Machinery equipment manufacturing |                              |
|                | Railway equipment                 |                              |
|                | Auto manufacturing                |                              |
|                | Shipbuilding                      |                              |
|                | Appliance manufacturing           |                              |
|                | Electronic equipment              |                              |
|                | Other industry                    |                              |
| Transportation | Motor vehicles                    | Light-duty gasoline vehicles |
|                |                                   | Light-duty diesel vehicles   |
|                |                                   | Heavy-duty gasoline vehicles |
|                |                                   | Heavy-duty diesel vehicles   |
|                |                                   | Heavy-duty gasoline truck    |
|                |                                   | Heavy-duty diesel truck      |
|                |                                   | Taxi/Bus/ Motorcycles        |
|                | Non-road machinery                | Agricultural machinery       |
|                |                                   | Construction machinery       |
|                |                                   | Garden equipment             |
|                |                                   | Ground handling equipment    |
|                |                                   | Factory machinery            |

---

---

|                 |                                                |                                                |
|-----------------|------------------------------------------------|------------------------------------------------|
|                 |                                                | Port machinery                                 |
| Residential     | Marine                                         |                                                |
|                 | Aviation aircraft                              |                                                |
|                 | Residential combustion                         |                                                |
|                 | Architectural coating                          |                                                |
|                 | Housing retrofitting emissions                 |                                                |
|                 | Ship fittings and repairs                      |                                                |
|                 | Consumer products                              |                                                |
|                 | Solvent degreasing                             |                                                |
|                 | Auto repair                                    |                                                |
|                 | Dry cleaning                                   |                                                |
|                 | Hospital solvent                               |                                                |
|                 | Catering                                       |                                                |
|                 | Sewage treatment                               |                                                |
|                 | Waste treatment                                | Landfill/Composting                            |
| Oil depot       | Crude oil/Gasoline/Diesel/Heavy oil/ Chemicals |                                                |
| Agriculture     | Gas station                                    |                                                |
|                 | Livestock                                      | Cow/Horse/Donkey/Mule/Pig/Sheep/Rabbit/Poultry |
|                 | Nitrogen fertilizer application                | Fertilizer-N/Fertilizer-P/Fertilizer-K         |
|                 | Soil background                                |                                                |
|                 | Nitrogen fixing plants                         |                                                |
|                 | Biofuel                                        | Rice straw/Wheat/Corn/Bean/Tuber/Cotton        |
| Biogenic source | Human excrement                                |                                                |
|                 | Biogenic volatile organic compounds emissions  |                                                |

---

**Table S2 Comparisons between observed and simulated meteorological parameters in D3 (OBS and SIM represent observation and simulation, respectively).**

| Meteorological parameters | Evaluation Indicators | 2015   | 2016   | 2017   | 2018   | 2019   | Recommended range |
|---------------------------|-----------------------|--------|--------|--------|--------|--------|-------------------|
| WS10                      | OBS (m/s)             | 2.91   | 2.63   | 2.88   | 2.37   | 2.55   |                   |
|                           | SIM (m/s)             | 2.92   | 2.67   | 2.89   | 2.63   | 2.81   |                   |
|                           | Bias (m/s)            | 0.01   | 0.04   | 0.04   | 0.27   | 0.26   | $\leq \pm 0.5$    |
|                           | RMSE (m/s)            | 0.27   | 0.29   | 0.33   | 0.27   | 0.3    | $\leq 2.0$        |
|                           | IOA                   | 0.82   | 0.72   | 0.94   | 0.87   | 0.85   | $\geq 0.6$        |
|                           | R                     | 0.89   | 0.82   | 0.82   | 0.89   | 0.75   |                   |
| WD10                      | OBS (°)               | 184.29 | 163.29 | 169.28 | 174.34 | 151.75 |                   |
|                           | SIM (°)               | 165.37 | 147.09 | 159.80 | 155.66 | 143.8  |                   |
|                           | Bias                  | -18.92 | -16.2  | -9.48  | -18.68 | -7.95  | $\leq \pm 10$     |
|                           | R                     | 0.69   | 0.74   | 0.8    | 0.71   | 0.66   |                   |
| T2                        | OBS (°C)              | 15.96  | 16.02  | 16.54  | 16.85  | 15.78  |                   |
|                           | SIM (°C)              | 16.19  | 15.73  | 16.33  | 16.35  | 15.45  |                   |
|                           | Bias (°C)             | 0.23   | -0.29  | -0.21  | -0.5   | -0.33  | $\leq \pm 0.5$    |
|                           | RMSE (°C)             | 1.76   | 0.95   | 1.27   | 0.69   | 1.36   | $\leq 2.0$        |
|                           | IOA                   | 0.95   | 0.98   | 0.95   | 0.99   | 0.91   | $\geq 0.8$        |
|                           | R                     | 0.94   | 0.91   | 0.89   | 0.96   | 0.88   |                   |
| RH2                       | OBS (%)               | 65.16  | 75.69  | 79.81  | 71.96  | 68.35  |                   |
|                           | SIM (%)               | 61.87  | 76.21  | 82.24  | 70.80  | 63.91  |                   |
|                           | Bias (%)              | -3.29  | 0.52   | 2.43   | -1.16  | -4.44  |                   |
|                           | RMSE (%)              | 6.61   | 3.86   | 4.24   | 4.07   | 5.18   |                   |
|                           | IOA                   | 0.97   | 0.98   | 0.95   | 0.98   | 0.83   | $\geq 0.7$        |
|                           | R                     | 0.92   | 0.85   | 0.89   | 0.94   | 0.87   |                   |



**Table S3 The meteorological variation (VMET) and emission variation scenarios (VEMIS) for evaluating the contributions of the two factors to changing air quality for 2015-2017 and 2017-2019.**

|       | Contribution 2015-2017 | Contribution 2017-2019 |
|-------|------------------------|------------------------|
| VMET  | E2017M2017-E2017M2015  | E2017M2019-E2017M2017  |
| VEMIS | E2017M2017-E2015M2017  | E2019M2017-E2017M2017  |

Note: VMET and VEMIS were simulated to estimate the contributions of changing meteorology and emissions, respectively. E2017M2017 means the simulation with emission inventory for 2017 and meteorological fields for 2017, and so on.

**Table S4 Annual air pollutant emissions in Jiangsu from 2015 to 2019 (Gg·yr<sup>-1</sup>).**

| Year           | SO <sub>2</sub> | NO <sub>x</sub> | AVOCs | NH <sub>3</sub> | CO   | PM <sub>10</sub> | PM <sub>2.5</sub> | BC | OC |
|----------------|-----------------|-----------------|-------|-----------------|------|------------------|-------------------|----|----|
| Power          | 222             | 351             | 29    | 0               | 607  | 71               | 46                | 0  | 0  |
| Industry       | 325             | 465             | 854   | 14              | 4974 | 481              | 300               | 15 | 7  |
| Transportation | 35              | 546             | 195   | 6               | 1132 | 31               | 29                | 12 | 4  |
| Residential    | 45              | 49              | 270   | 15              | 1022 | 128              | 116               | 7  | 33 |
| Agriculture    | 0               | 0               | 0     | 433             | 0    | 0                | 0                 | 0  | 0  |
| 2015 Total     | 627             | 1411            | 1348  | 468             | 7735 | 711              | 491               | 34 | 44 |
| Power          | 191             | 282             | 28    | 0               | 549  | 51               | 35                | 0  | 0  |
| Industry       | 305             | 450             | 838   | 14              | 4623 | 477              | 295               | 14 | 10 |
| Transportation | 39              | 613             | 208   | 7               | 1207 | 33               | 32                | 13 | 4  |
| Residential    | 45              | 46              | 272   | 16              | 1018 | 126              | 113               | 7  | 29 |
| Agriculture    | 0               | 0               | 0     | 415             | 0    | 0                | 0                 | 0  | 0  |
| 2016 Total     | 580             | 1391            | 1347  | 452             | 7397 | 687              | 475               | 34 | 43 |
| Power          | 123             | 263             | 26    | 0               | 493  | 54               | 36                | 0  | 0  |
| Industry       | 207             | 359             | 837   | 14              | 4527 | 465              | 288               | 12 | 9  |
| Transportation | 41              | 664             | 209   | 8               | 1272 | 35               | 33                | 14 | 5  |
| Residential    | 45              | 45              | 271   | 20              | 1013 | 122              | 111               | 7  | 27 |
| Agriculture    | 0               | 0               | 0     | 392             | 0    | 0                | 0                 | 0  | 0  |
| 2017 Total     | 416             | 1331            | 1343  | 434             | 7305 | 676              | 468               | 33 | 41 |
| Power          | 128             | 251             | 26    | 0               | 490  | 51               | 32                | 0  | 0  |
| Industry       | 158             | 184             | 848   | 14              | 4452 | 455              | 282               | 11 | 9  |
| Transportation | 43              | 717             | 163   | 7               | 1323 | 44               | 42                | 15 | 5  |
| Residential    | 45              | 46              | 269   | 19              | 987  | 120              | 106               | 7  | 26 |
| Agriculture    | 0               | 0               | 0     | 390             | 0    | 0                | 0                 | 0  | 0  |
| 2018 Total     | 374             | 1198            | 1306  | 430             | 7252 | 670              | 462               | 33 | 40 |
| Power          | 80              | 186             | 26    | 0               | 484  | 43               | 28                | 0  | 0  |
| Industry       | 127             | 137             | 839   | 14              | 4349 | 374              | 240               | 10 | 7  |
| Transportation | 44              | 754             | 151   | 8               | 1356 | 45               | 43                | 15 | 5  |
| Residential    | 45              | 45              | 255   | 17              | 974  | 103              | 100               | 7  | 24 |
| Agriculture    | 0               | 0               | 0     | 383             | 0    | 0                | 0                 | 0  | 0  |
| 2019 Total     | 296             | 1122            | 1271  | 422             | 7163 | 565              | 411               | 32 | 36 |

**Table S5 The emission data of SO<sub>2</sub>, NO<sub>x</sub>, AVOCs, PM<sub>2.5</sub>, and NH<sub>3</sub> by year and city for 2015 and 2019 (Gg·yr<sup>-1</sup>).**

|                 | SO <sub>2</sub> | NO <sub>x</sub> | PM <sub>2.5</sub> | AVOCs  | NH <sub>3</sub> |
|-----------------|-----------------|-----------------|-------------------|--------|-----------------|
| Southern cities | 334.5           | 684.1           | 229.1             | 602.8  | 81.4            |
| Nanjing         | 58.5            | 192.7           | 63.7              | 94.4   | 17.2            |
| Suzhou          | 150.8           | 205.5           | 55.0              | 237.2  | 25.1            |
| Wuxi            | 62.9            | 107.2           | 36.4              | 108.6  | 13.9            |
| Changzhou       | 39.0            | 111.9           | 48.4              | 92.0   | 13.7            |
| Zhenjiang       | 23.3            | 66.9            | 25.6              | 70.7   | 11.5            |
| Northern cities | 186.4           | 463.5           | 167.1             | 462.8  | 279.9           |
| Xuzhou          | 73.1            | 131.4           | 50.6              | 92.3   | 74.3            |
| Lianyungang     | 24.9            | 80.9            | 29.9              | 86.4   | 39.3            |
| Suqian          | 18.4            | 52.8            | 18.8              | 80.1   | 39.3            |
| Huaian          | 28.5            | 100.9           | 28.2              | 103.4  | 39.7            |
| Yancheng        | 41.4            | 97.5            | 39.7              | 100.7  | 87.3            |
| Central cities  | 106.7           | 264.5           | 94.5              | 282.3  | 107.2           |
| Yangzhou        | 24.9            | 68.1            | 23.2              | 66.1   | 21.8            |
| Taizhou         | 32.5            | 69.1            | 37.3              | 99.7   | 27.2            |
| Nantong         | 49.3            | 127.3           | 34.0              | 116.4  | 58.3            |
| 2015 Total      | 627.6           | 1412.1          | 490.7             | 1347.9 | 468.5           |
| Southern cities | 136.3           | 524.5           | 174.9             | 665.0  | 73.2            |
| Nanjing         | 28.6            | 135.3           | 47.7              | 119.6  | 18.3            |
| Suzhou          | 43.7            | 145.4           | 39.4              | 284.3  | 19.8            |
| Wuxi            | 32.0            | 109.1           | 31.0              | 128.0  | 13.9            |
| Changzhou       | 23.7            | 70.9            | 35.8              | 83.8   | 12.2            |
| Zhenjiang       | 9.4             | 63.7            | 21.0              | 49.4   | 9.0             |
| Northern cities | 87.0            | 379.7           | 154.0             | 335.9  | 253.9           |
| Xuzhou          | 22.4            | 85.3            | 47.1              | 78.0   | 65.0            |
| Lianyungang     | 22.1            | 87.1            | 24.5              | 77.7   | 34.9            |
| Suqian          | 11.5            | 56.9            | 18.0              | 49.4   | 37.4            |
| Huaian          | 18.2            | 78.6            | 24.5              | 62.2   | 37.9            |
| Yancheng        | 12.7            | 71.8            | 40.0              | 68.7   | 78.7            |
| Central cities  | 71.5            | 217.9           | 82.4              | 270.2  | 95.3            |
| Yangzhou        | 21.4            | 52.0            | 16.1              | 74.5   | 22.5            |
| Taizhou         | 20.4            | 48.8            | 36.3              | 92.0   | 25.9            |
| Nantong         | 29.7            | 117.1           | 30.0              | 103.7  | 46.9            |
| 2019 Total      | 295.8           | 1122.2          | 411.4             | 1271.1 | 422.5           |

**Table S6 Comparison of observed and simulated hourly PM<sub>2.5</sub> concentrations by month in Jiangsu. In total, 110 state-operated observation sites were included in the comparison.**

|         | Observation Simulation ( $\mu\text{g}\cdot\text{m}^{-3}$ ) |                         |                   | R          |      | NMB (%)    |        | NME (%)    |       |
|---------|------------------------------------------------------------|-------------------------|-------------------|------------|------|------------|--------|------------|-------|
|         | ( $\mu\text{g}\cdot\text{m}^{-3}$ )                        | This study <sup>a</sup> | MEIC <sup>c</sup> | This study | MEIC | This study | MEIC   | This study | MEIC  |
| 2015/1  | 97.06                                                      | 80.29                   | 72.11             | 0.40       | 0.25 | -10.47     | -25.69 | 48.07      | 53.10 |
| 2015/4  | 54.31                                                      | 42.42                   | 41.14             | 0.26       | 0.24 | -17.28     | -19.79 | 49.83      | 48.84 |
| 2015/7  | 39.36                                                      | 32.98                   | 30.09             | 0.37       | 0.34 | -8.58      | -17.23 | 59.96      | 58.15 |
| 2015/10 | 56.55                                                      | 42.33                   | 39.66             | 0.44       | 0.29 | -14.53     | -30.27 | 50.15      | 52.58 |
| 2016/1  | 81.87                                                      | 71.80                   | 64.32             | 0.41       | 0.30 | -12.29     | -17.25 | 43.64      | 43.80 |
| 2016/4  | 50.42                                                      | 49.03                   | 41.34             | 0.24       | 0.20 | -2.77      | -15.33 | 56.48      | 49.15 |
| 2016/7  | 30.60                                                      | 34.23                   | 34.80             | 0.24       | 0.19 | 11.86      | 16.81  | 49.25      | 57.36 |
| 2016/10 | 28.93                                                      | 26.44                   | 24.33             | 0.31       | 0.30 | -8.62      | -14.65 | 36.79      | 51.98 |
| 2017/1  | 66.51                                                      | 64.65                   | 50.68             | 0.33       | 0.35 | -19.71     | -21.43 | 49.46      | 58.15 |
| 2017/4  | 49.09                                                      | 46.59                   | 40.81             | 0.27       | 0.15 | -17.32     | -15.39 | 54.50      | 58.69 |
| 2017/7  | 29.87                                                      | 33.80                   | 33.45             | 0.25       | 0.20 | -9.13      | 11.57  | 28.82      | 35.89 |
| 2017/10 | 34.48                                                      | 36.77                   | 29.40             | 0.45       | 0.42 | -7.29      | -15.09 | 37.44      | 51.90 |
| 2018/1  | 83.95                                                      | 61.24                   | 53.66             | 0.57       | 0.40 | -27.05     | -33.49 | 49.50      | 58.57 |
| 2018/4  | 47.93                                                      | 37.86                   | 41.70             | 0.28       | 0.10 | -23.67     | -12.99 | 54.85      | 56.16 |
| 2018/7  | 24.42                                                      | 23.03                   | 28.63             | 0.37       | 0.24 | -5.71      | 17.50  | 56.55      | 28.66 |
| 2018/10 | 38.97                                                      | 20.01                   | 11.16             | 0.20       | 0.17 | -28.67     | -43.36 | 41.21      | 43.34 |
| 2019/1  | 72.29                                                      | 77.79                   | 64.55             | 0.29       | 0.10 | 7.61       | -11.53 | 38.72      | 52.74 |
| 2019/4  | 40.32                                                      | 49.62                   | 43.96             | 0.27       | 0.20 | 23.07      | 7.87   | 45.58      | 54.51 |
| 2019/7  | 25.20                                                      | 26.86                   | 27.35             | 0.19       | 0.10 | 6.58       | 21.45  | 42.08      | 53.40 |
| 2019/10 | 38.40                                                      | 20.63                   | 16.54             | 0.20       | 0.12 | -29.32     | -38.15 | 49.43      | 52.46 |

This study<sup>a</sup>: simulation with a horizontal resolution of 3 km (D3).

MEIC<sup>c</sup>: simulation with a horizontal resolution of 9 km (D2).

**Table S7 The same as Table S6 but for MDA8 O<sub>3</sub>.**

|         | Observation Simulation ( $\mu\text{g}\cdot\text{m}^{-3}$ ) |                         |                   | R          |      | NMB (%)    |        | NME (%)    |       |
|---------|------------------------------------------------------------|-------------------------|-------------------|------------|------|------------|--------|------------|-------|
|         | ( $\mu\text{g}\cdot\text{m}^{-3}$ )                        | This study <sup>a</sup> | MEIC <sup>c</sup> | This study | MEIC | This study | MEIC   | This study | MEIC  |
| 2015/1  | 50.93                                                      | 35.83                   | 39.54             | 0.25       | 0.17 | -29.64     | -25.20 | 47.13      | 42.58 |
| 2015/4  | 108.70                                                     | 82.61                   | 79.20             | 0.37       | 0.26 | -24.01     | -27.14 | 36.43      | 41.89 |
| 2015/7  | 107.18                                                     | 85.58                   | 86.53             | 0.48       | 0.41 | -20.15     | -19.85 | 36.74      | 41.82 |
| 2015/10 | 114.98                                                     | 78.27                   | 78.27             | 0.37       | 0.37 | -31.93     | -31.93 | 37.34      | 37.34 |
| 2016/1  | 60.19                                                      | 40.62                   | 38.52             | 0.29       | 0.32 | -32.52     | -36.00 | 41.43      | 42.69 |
| 2016/4  | 117.37                                                     | 85.40                   | 85.10             | 0.49       | 0.47 | -27.24     | -27.49 | 37.23      | 39.03 |
| 2016/7  | 118.38                                                     | 95.91                   | 110.76            | 0.58       | 0.50 | -11.10     | -6.44  | 31.68      | 31.61 |
| 2016/10 | 74.36                                                      | 67.71                   | 64.41             | 0.51       | 0.45 | -8.94      | -13.50 | 30.37      | 31.39 |
| 2017/1  | 66.37                                                      | 44.2                    | 42.70             | 0.43       | 0.44 | -29.39     | -35.67 | 38.71      | 41.95 |
| 2017/4  | 134.06                                                     | 103.52                  | 98.58             | 0.57       | 0.60 | -17.48     | -26.47 | 26.68      | 31.23 |
| 2017/7  | 134.59                                                     | 116.08                  | 145.43            | 0.44       | 0.37 | -11.86     | 8.05   | 31.58      | 35.81 |
| 2017/10 | 91.28                                                      | 85.92                   | 81.97             | 0.57       | 0.37 | -3.69      | -10.20 | 24.93      | 26.75 |
| 2018/1  | 57.95                                                      | 52.61                   | 52.32             | 0.12       | 0.26 | -9.21      | 42.04  | 38.74      | 66.28 |
| 2018/4  | 134.87                                                     | 106.68                  | 85.74             | 0.67       | 0.29 | -20.90     | -36.00 | 27.36      | 42.66 |
| 2018/7  | 118.01                                                     | 117.53                  | 114.78            | 0.45       | 0.43 | -0.41      | 3.26   | 32.50      | 35.30 |
| 2018/10 | 108.75                                                     | 79.42                   | 70.85             | 0.33       | 0.31 | -26.97     | -34.66 | 34.99      | 39.03 |
| 2019/1  | 50.48                                                      | 48.43                   | 43.41             | 0.28       | 0.20 | -9.99      | -13.99 | 44.02      | 57.07 |
| 2019/4  | 112.93                                                     | 101.95                  | 94.46             | 0.50       | 0.41 | -21.24     | -16.35 | 31.71      | 39.57 |
| 2019/7  | 138.71                                                     | 124.22                  | 118.45            | 0.33       | 0.31 | -12.65     | -16.70 | 43.33      | 34.17 |
| 2019/10 | 109.55                                                     | 88.26                   | 80.72             | 0.28       | 0.20 | -21.57     | -24.10 | 43.93      | 35.89 |

This study<sup>a</sup>: simulation with a horizontal resolution of 3 km (D3).

MEIC<sup>c</sup>: simulation with a horizontal resolution of 9 km (D2).

**Table S8 Comparison of observed and simulated hourly SO<sub>2</sub> and NO<sub>2</sub> concentrations by month for 2017 in Jiangsu. In total, 110 state-operated observation sites were included in the comparison.**

|                 |         | Observation Simulation ( $\mu\text{g}\cdot\text{m}^{-3}$ ) |                         | R          | NMB (%)    |                   | NME (%)    |        |
|-----------------|---------|------------------------------------------------------------|-------------------------|------------|------------|-------------------|------------|--------|
|                 |         | ( $\mu\text{g}\cdot\text{m}^{-3}$ )                        | This study <sup>a</sup> | This study | This study | MEIC <sup>b</sup> | This study | MEIC   |
| SO <sub>2</sub> | 2017/1  | 19.73                                                      | 14.68                   | 0.36       | -25.14     | 53.96             | 43.24      | 92.53  |
|                 | 2017/4  | 20.60                                                      | 13.14                   | 0.44       | -27.57     | 35.03             | 53.17      | 83.59  |
|                 | 2017/7  | 14.06                                                      | 8.82                    | 0.42       | -24.22     | 67.77             | 46.03      | 113.54 |
|                 | 2017/10 | 13.21                                                      | 6.86                    | 0.53       | -38.01     | 58.70             | 51.85      | 110.01 |
| NO <sub>2</sub> | 2017/1  | 42.68                                                      | 51.23                   | 0.44       | 29.25      | 58.69             | 47.22      | 73.45  |
|                 | 2017/4  | 38.24                                                      | 47.58                   | 0.40       | 26.01      | 51.47             | 47.19      | 65.46  |
|                 | 2017/7  | 25.77                                                      | 42.08                   | 0.32       | 21.88      | 133.05            | 37.85      | 138.17 |
|                 | 2017/10 | 30.46                                                      | 42.34                   | 0.31       | 40.17      | 50.02             | 61.31      | 71.08  |

This study<sup>a</sup>: simulation with a horizontal resolution of 3 km (D3);

MEIC<sup>b</sup>: simulation with a horizontal resolution of 12 km (unpublished data, provided by the MEIC team, Tsinghua University).

Figure S1

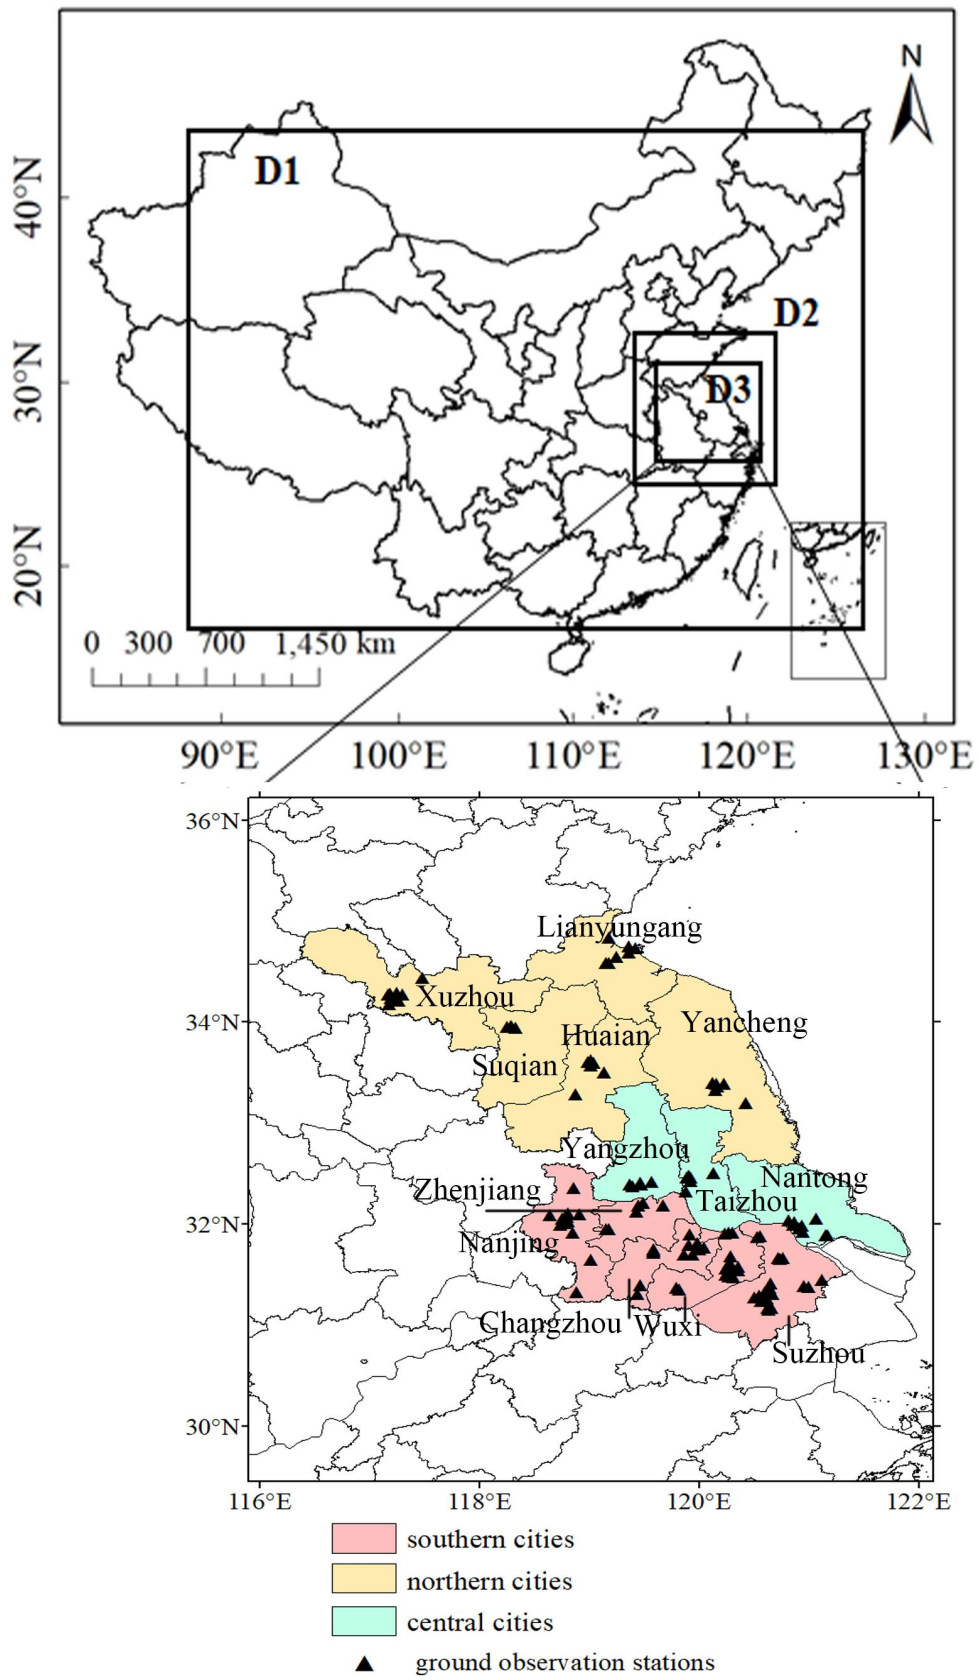

**Figure S2**

|                                                       |                                                                                                                                         |                                                                                                                     |                                                                                                |                                                                                                                            |             |
|-------------------------------------------------------|-----------------------------------------------------------------------------------------------------------------------------------------|---------------------------------------------------------------------------------------------------------------------|------------------------------------------------------------------------------------------------|----------------------------------------------------------------------------------------------------------------------------|-------------|
| 1) Ultra-low emission of coal-fired power plants      | 33% meet "ultralow emission" standard                                                                                                   | 84% meet "ultralow emission" standard                                                                               | 100% meet "ultralow emission" standard                                                         |                                                                                                                            |             |
| 2) Extensive management of coal-fired boilers         | 100 MW of coal-fired power generation capacity were phased out<br>Eliminated non-heating coal-fired power units (< 300 MW)              |                                                                                                                     | Remediation of coal-fired boilers (< 10 steam tons/hour)                                       |                                                                                                                            |             |
| 3) Upgrade and renovation of non-electrical industry  | Iron and steel                                                                                                                          | 80% with high efficiency de-S devices                                                                               | 60% meet "ultralow emission" standard                                                          |                                                                                                                            |             |
|                                                       | Cement                                                                                                                                  | 89% with high efficiency de-N devices                                                                               | Ultra-low emission transformation of 22 cement clinker enterprises                             |                                                                                                                            |             |
|                                                       | Flat glass                                                                                                                              | 40% & 17% equipped with de-S and de-N devices                                                                       | 30% equipped with de-N devices                                                                 |                                                                                                                            |             |
| 4) Phase out outdated industrial capacities           | Iron and steel                                                                                                                          | Eliminated 8 million ton outdated capacity                                                                          | Eliminated 18 million ton outdated capacity                                                    |                                                                                                                            |             |
|                                                       | Cement                                                                                                                                  | Eliminated 9 million ton outdated capacity                                                                          | Eliminated 50% of outdated coking capacity                                                     |                                                                                                                            |             |
|                                                       | Flat glass                                                                                                                              | Eliminated 3 million weight boxes outdated capacity                                                                 | Eliminated 8 million weight boxes outdated capacity                                            |                                                                                                                            |             |
| 5) Phase out small polluting factories                | 1,400 petrochemical industry enterprises were phased out or rectified                                                                   |                                                                                                                     | 1750 enterprises were phased out or rectified                                                  |                                                                                                                            |             |
| 6) Construction of port shore power                   | 15% equipped with shore power in port<br>Reach 40% electric coverage (Oil to Electric)                                                  |                                                                                                                     | 30% equipped with shore power in port<br>Reach 60% electric coverage                           |                                                                                                                            |             |
| 7) Comprehensive treatment of mobile source pollution | Emission standard                                                                                                                       | "China V" standard (on road)                                                                                        | "China VI" standard (on road)<br>> "China II" standard (non-on road)                           |                                                                                                                            |             |
|                                                       | Old cars                                                                                                                                | Eliminated 0.7 million old vehicles                                                                                 | Eliminated 30,000 old trucks (< China III standard)                                            |                                                                                                                            |             |
|                                                       | New Energy cars                                                                                                                         | Promote 50,000 new energy vehicles                                                                                  | Promote 150,000 new energy vehicles<br>Replacement 80% of buses with new energy                |                                                                                                                            |             |
| 8) VOCs emission control in key sectors               | 17% of the industry enterprises treat the waste gas in the process                                                                      | 32% of the industry enterprises treat the waste gas in the process; Average end-of-pipe treatment efficiency of 30% |                                                                                                |                                                                                                                            |             |
| 9) Oil and gas recovery                               | 90% of gas stations, tanker trucks, and tank farms have achieved oil and gas recovery treatment                                         |                                                                                                                     | Average oil and gas recovery efficiency reached 95%                                            |                                                                                                                            |             |
| 10) Replacement with low-VOC paints                   | Switch to water-based paints with low VOCs content in 7 key industries                                                                  |                                                                                                                     | 20% reduction in the use of highly reactive solvents and auxiliary products                    |                                                                                                                            |             |
| 11) Application of leak detection and repair (LDAR)   | Implement LDAR in all chemical parks                                                                                                    |                                                                                                                     |                                                                                                |                                                                                                                            |             |
| 12) Control of non-point pollution                    |                                                                                                                                         |                                                                                                                     | Comprehensive utilization rate of straw reached 95%<br>Fertilizer utilization rate reached 40% |                                                                                                                            |             |
| 13) Promote clean energy                              | Applied washed clean coal<br>Coal substituted by NG and electricity in 30,000 households                                                |                                                                                                                     | NG has covered 70% of the province                                                             |                                                                                                                            |             |
|                                                       | <b>2015</b>                                                                                                                             | <b>2016</b>                                                                                                         | <b>2017</b>                                                                                    | <b>2018</b>                                                                                                                | <b>2019</b> |
| <b>List of Policies and Clean Air Actions</b>         | the National Action Plan on Air Pollution Control and Prevention (NAPAPCP, State Council of the People's Republic of China (SCC), 2013) |                                                                                                                     |                                                                                                | the "Three-Year Action Plan to Fight Air Pollution" (TYAPFAP, State Council of the People's Republic of China (SCC), 2018) |             |

Air Pollution Remediation Work Plan for Coal-fired Boilers in Jiangsu, (Department of ecological environment of Jiangsu, 2013)

VOCs Pollution Control Special Action Implementation Plan, (Department of ecological environment of Jiangsu, 2015)

Action Plan for Energy Saving, Emission Reduction and Renovation of Coal Power Units in Jiangsu (2014-2020), (The People's Government of Jiangsu, 2014)

The Implementation plan for Ultra-low Emission Transformation of Iron and Steel Enterprises in Jiangsu (2018), (Department of ecological environment of Jiangsu, 2018)



Figure S3

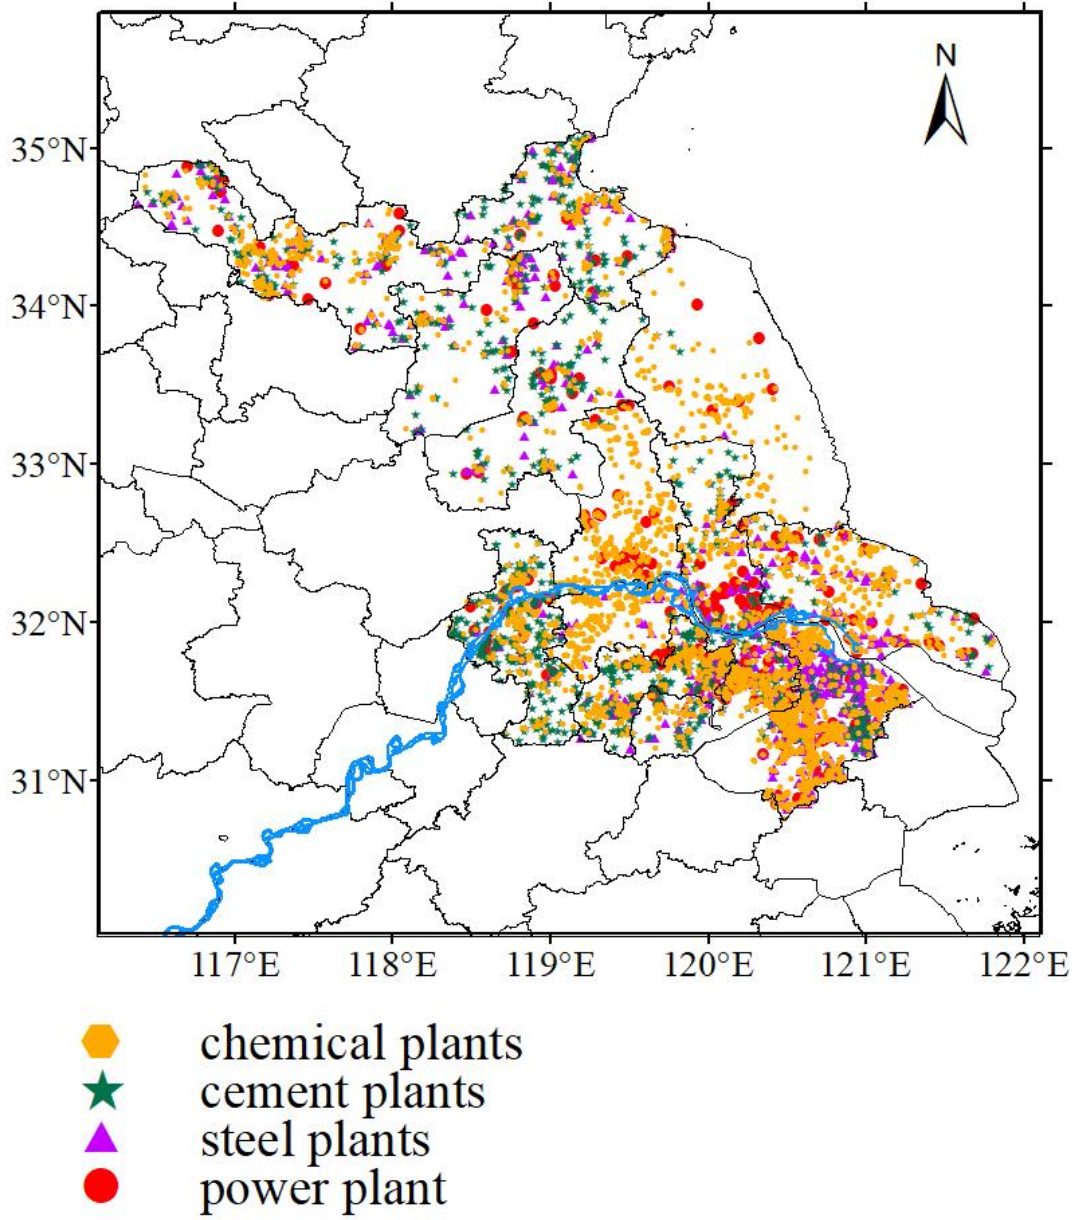

Figure S4

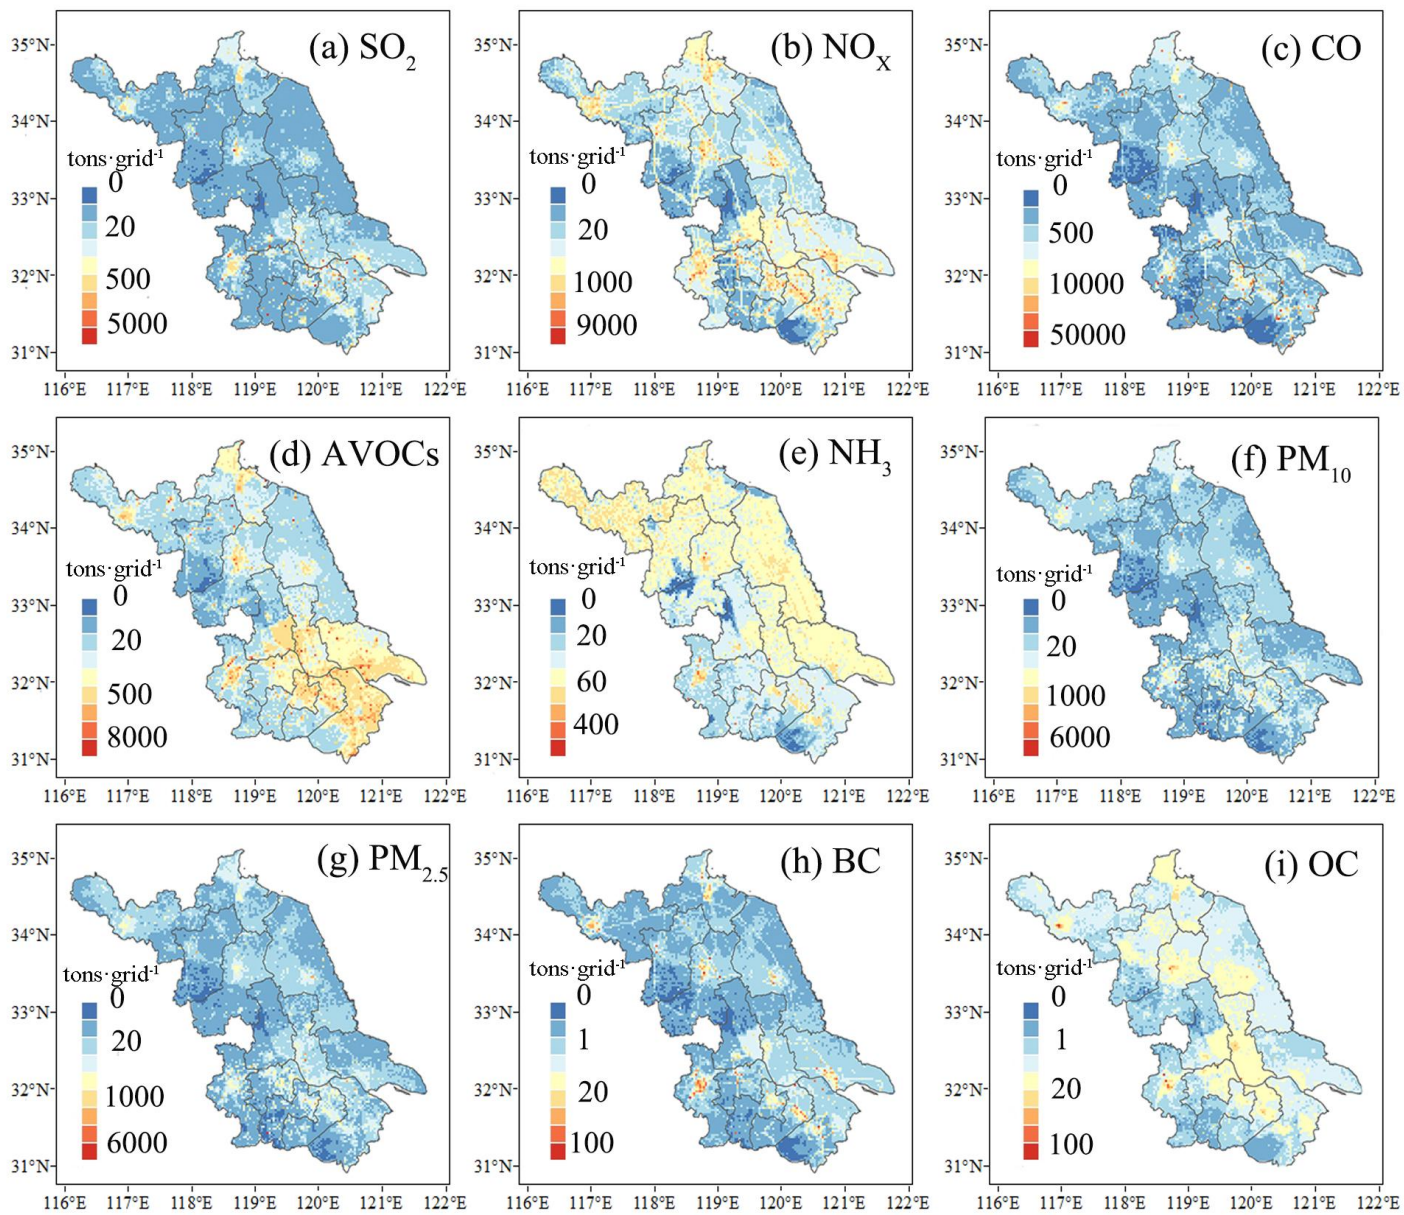



Figure S5

2015

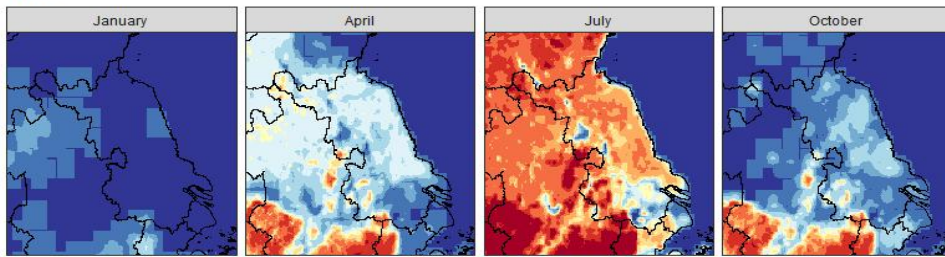

2016

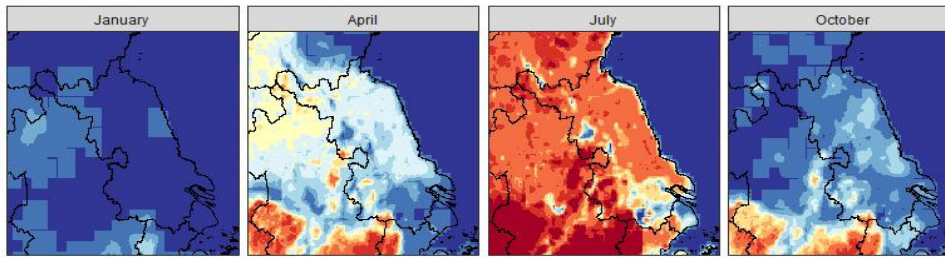

2017

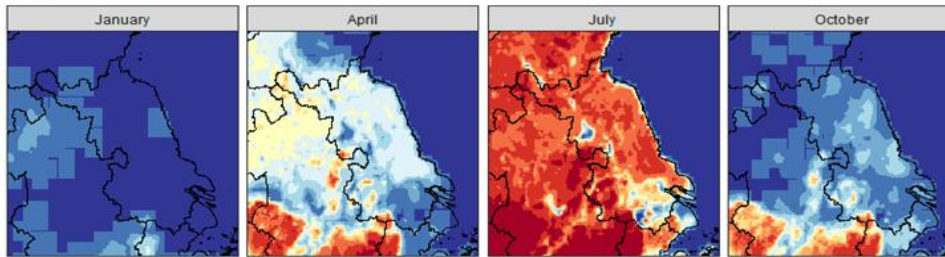

tons·grid<sup>-1</sup>

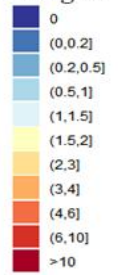

2018

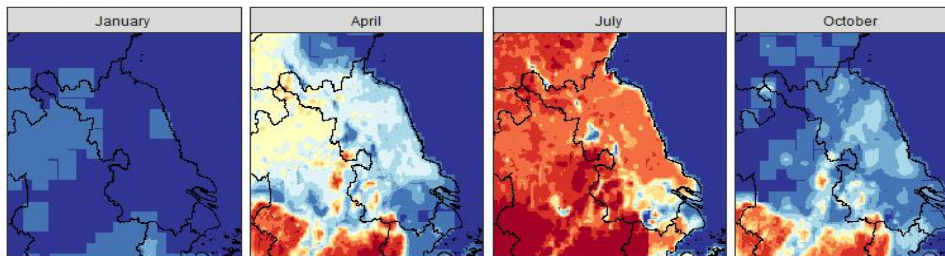

2019

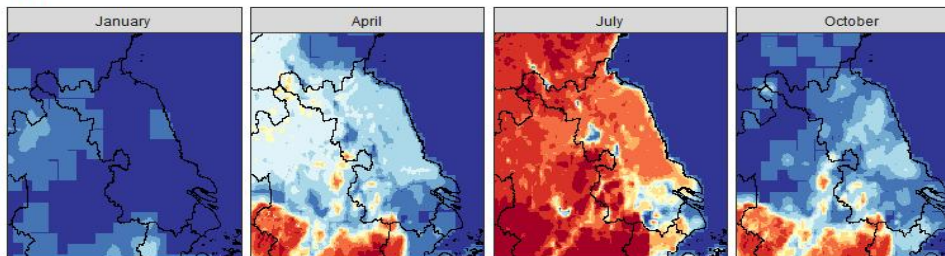

Figure S6

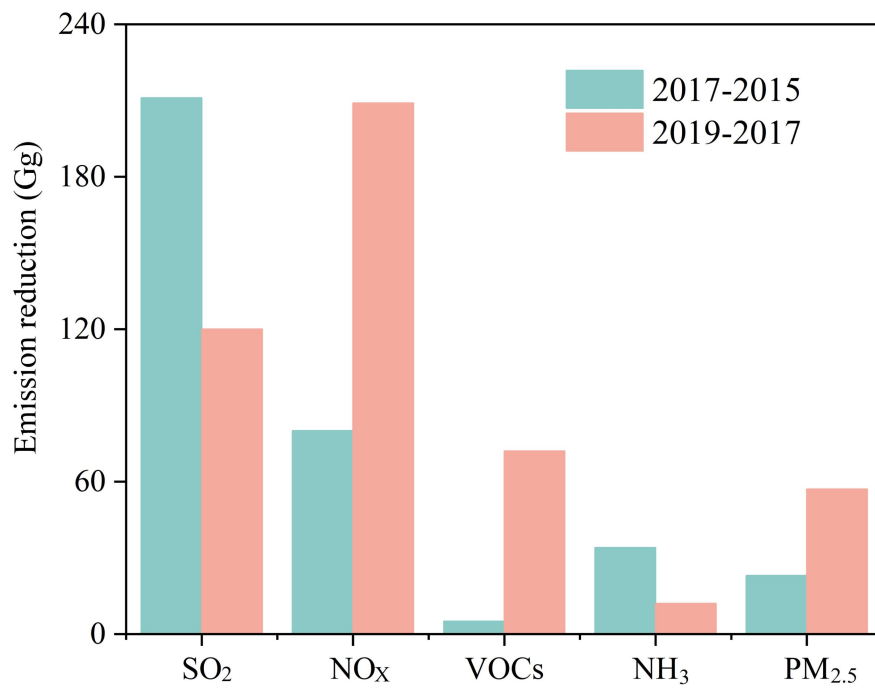

Figure S7

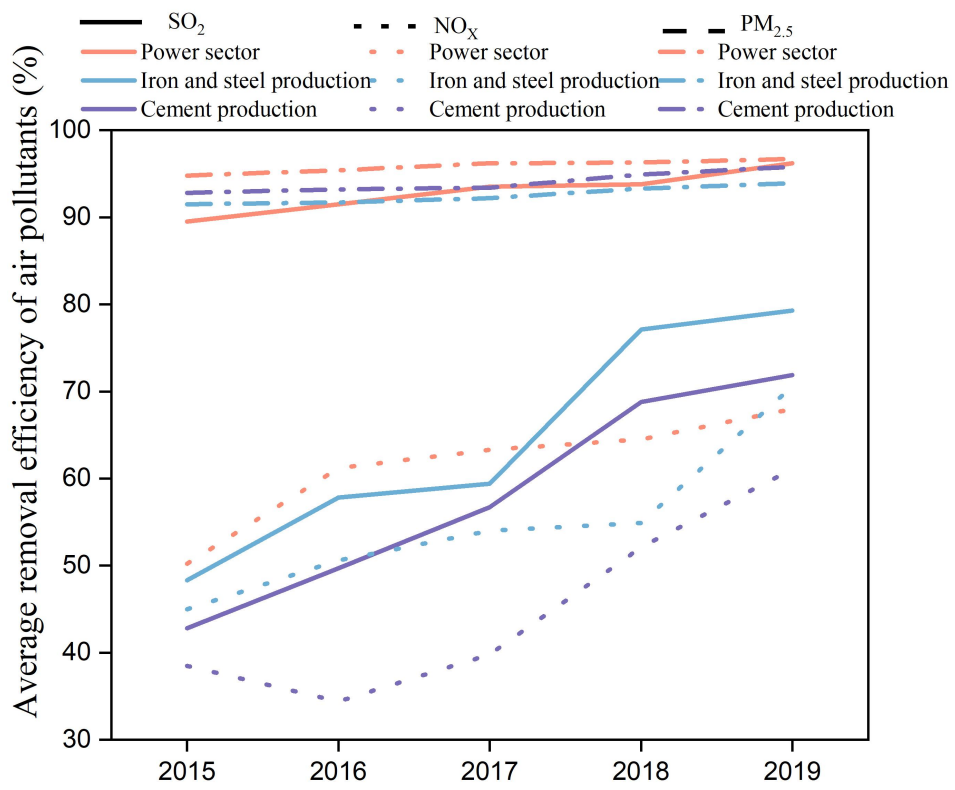

Figure S8

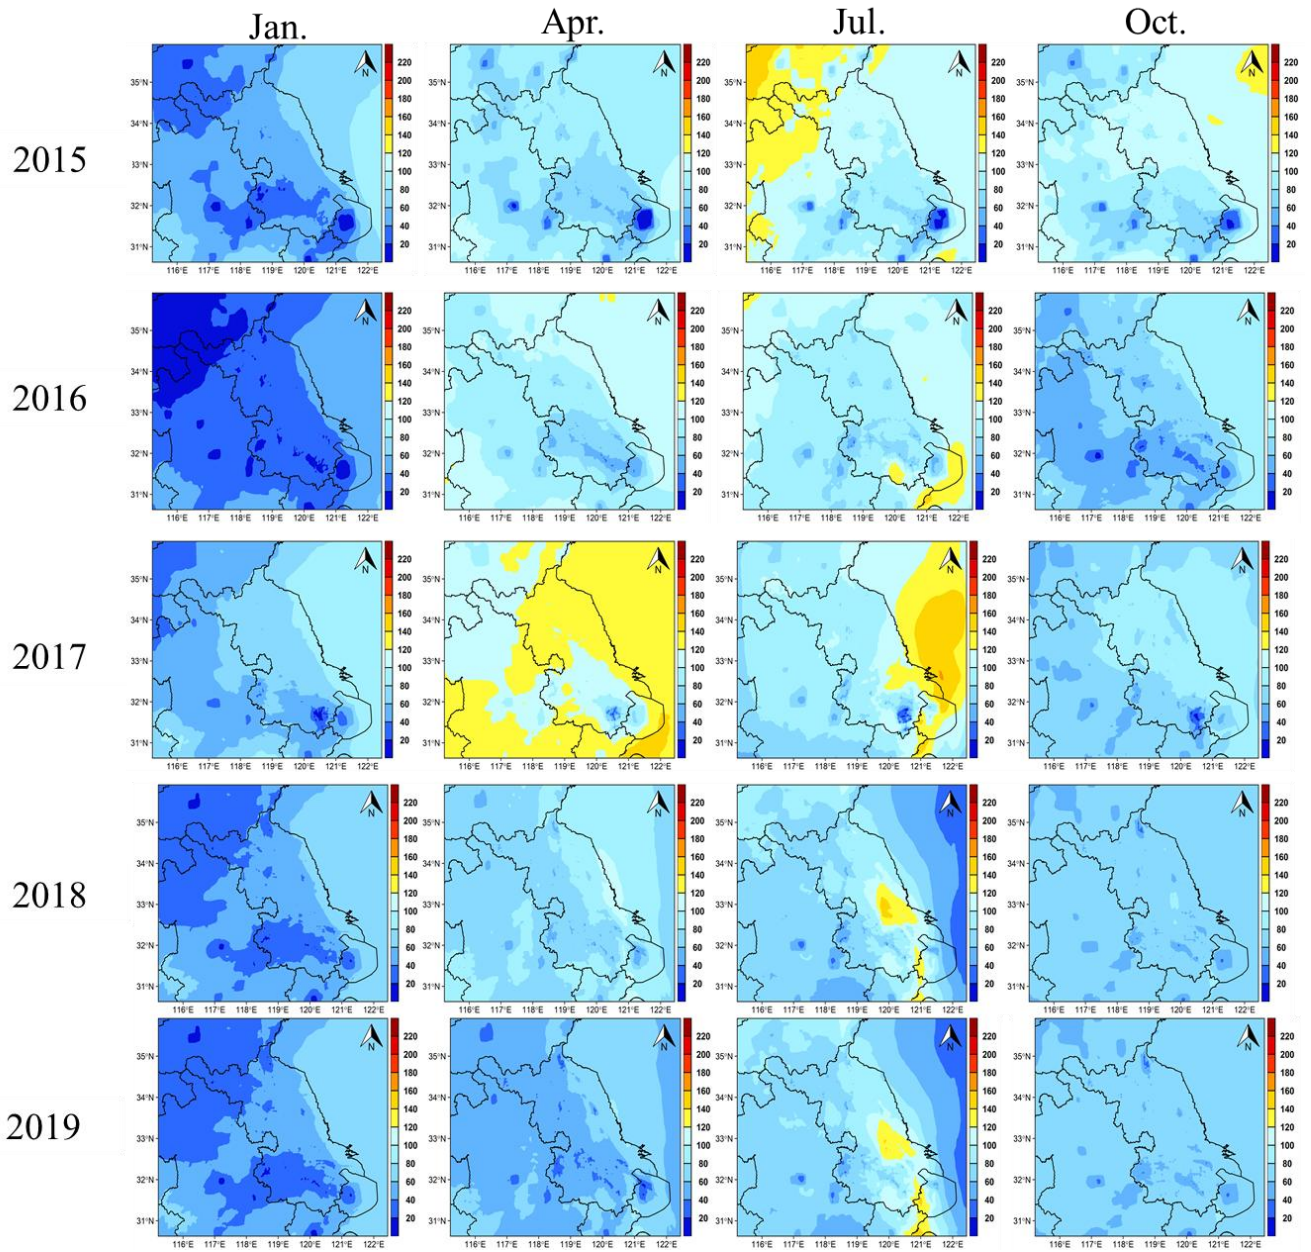



Figure S9

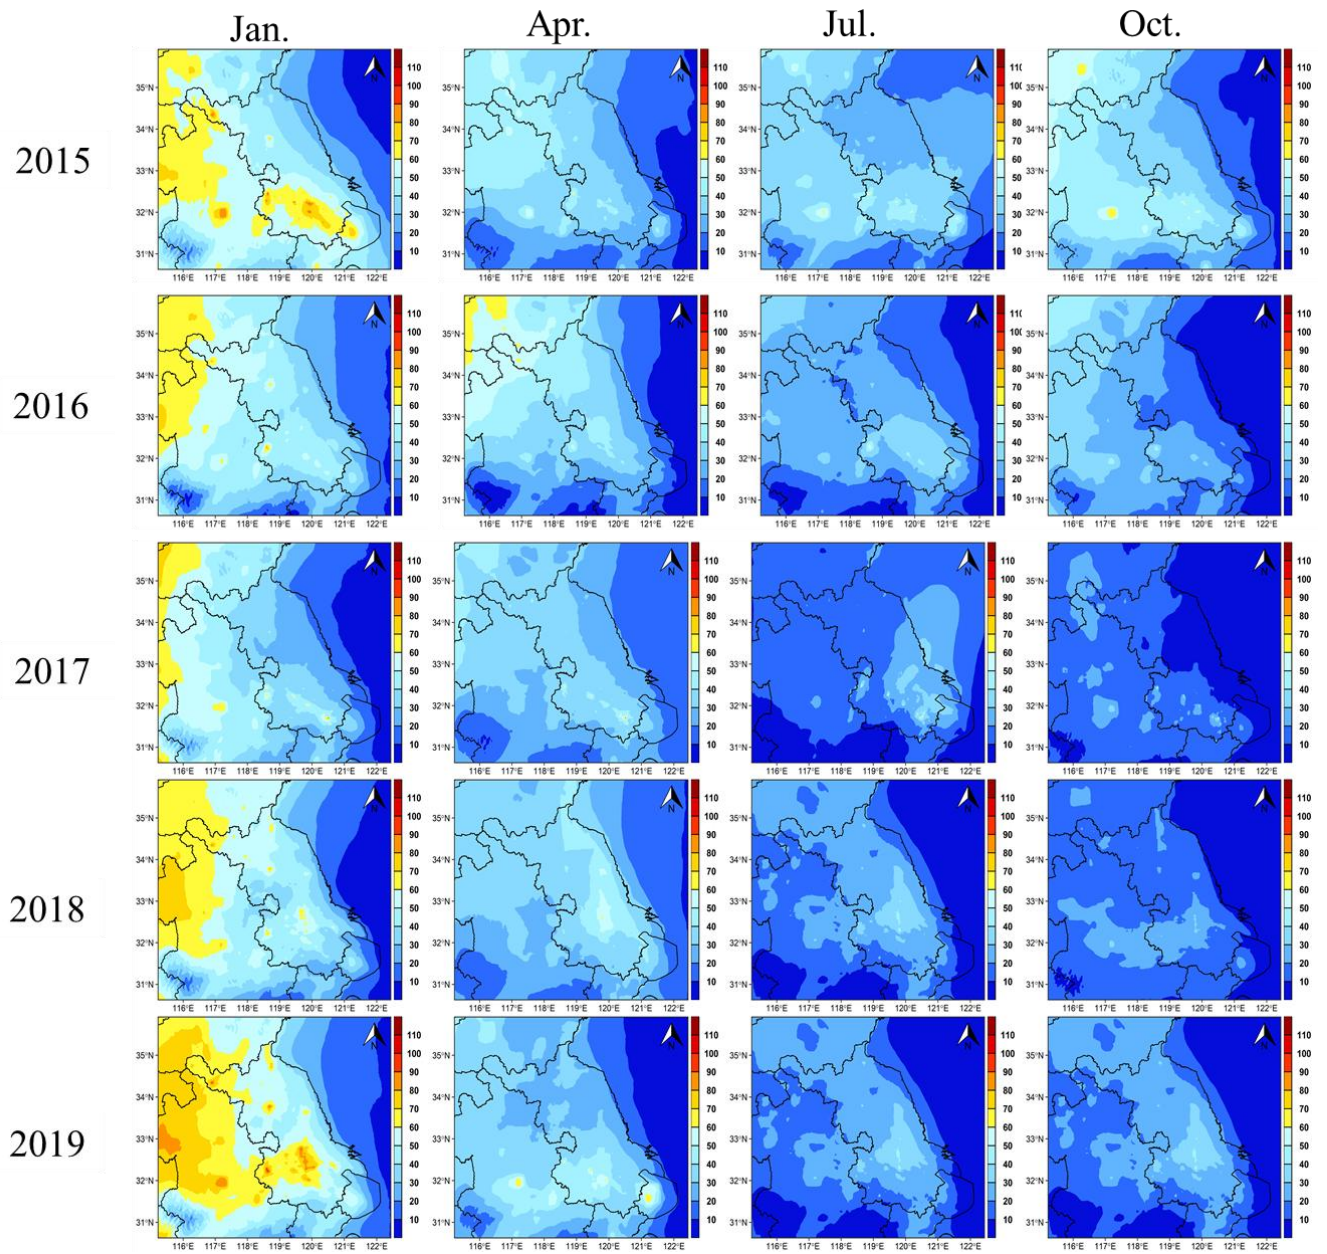

## References

Department of ecological environment of Jiangsu, Notice of the Jiangsu Provincial Government on issuing the air pollution prevention and control action plan.

[http://www.jiangsu.gov.cn/art/2014/1/6/art\\_46690\\_2586827.html](http://www.jiangsu.gov.cn/art/2014/1/6/art_46690_2586827.html).

Department of ecological environment of Jiangsu, Air Pollution Remediation Work Plan for Coal-fired Boilers in Jiangsu. <http://sthjt.jiangsu.gov.cn>.

Department of ecological environment of Jiangsu, VOCs Pollution Control Special Action Implementation Plan in Jiangsu.

[http://www.jiangsu.gov.cn/art/2018/1/25/art\\_46143\\_7431312.html](http://www.jiangsu.gov.cn/art/2018/1/25/art_46143_7431312.html).

Department of ecological environment of Jiangsu, The Implementation plan for Ultra-low Emission Transformation of Iron and Steel Enterprises in Jiangsu (2018). [http://sthjt.jiangsu.gov.cn/art/2019/5/22/art\\_83589\\_10046297.html](http://sthjt.jiangsu.gov.cn/art/2019/5/22/art_83589_10046297.html).

Ministry of Ecology and Environment of the People's Republic of China, 2020 Report on the state of the ecology and environment in China. <http://english.mee.gov.cn/Resources/Reports/soe/SOEE2019/202204/P020220407417638702591.pdf>.

The People's Government of Jiangsu, Notice of the Jiangsu Provincial Government on issuing the Three-year Action Plan to fight Air Pollution. [http://www.jiangsu.gov.cn/art/2018/10/17/art\\_64797\\_7842355.html](http://www.jiangsu.gov.cn/art/2018/10/17/art_64797_7842355.html).

The People's Government of Jiangsu, Action Plan for Energy Saving, Emission Reduction and Renovation of Coal Power Units in Jiangsu (2014-2020).

[http://www.jiangsu.gov.cn/art/2014/11/10/art\\_46144\\_2545297.html](http://www.jiangsu.gov.cn/art/2014/11/10/art_46144_2545297.html).
